# Supplementary material for: Prevalence and seasonal dynamics of blaCTX-M antibiotic resistance genes and fecal indicator organisms in the lower Lahn River, Germany
Source: PubMed Central journal article supplement (PMC7192499; doi:10.1371/journal.pone.0232289), 2020-04-30
Supplement: pone.0232289.s001.pdf [file pone.0232289.s001.pdf]

## Supporting Information

### Prevalence and seasonal dynamics of *bla*<sub>CTX-M</sub> antibiotic resistance genes and fecal indicator organisms in the lower Lahn River, Germany

Ilona Herrig<sup>1,2\*</sup>, Susanne Fleischmann<sup>1, #a</sup>, Julia Regnery<sup>1</sup>, Jessica Wesp<sup>1</sup>, Georg Reifferscheid<sup>1</sup>, Werner Manz<sup>2</sup>

<sup>1</sup> Department Biochemistry, Ecotoxicology, Federal Institute of Hydrology, Koblenz, Germany

<sup>2</sup> Department of Biology, Institute for Integrated Natural Sciences, University of Koblenz-Landau, Koblenz, Germany

<sup>#a</sup> Current Address: Department of Veterinary Medicine, Institute of Food Safety and Food Hygiene, FU Berlin, Germany

\* Corresponding author

E-mail: [iherrig@uni-koblenz.de](mailto:iherrig@uni-koblenz.de) (IH)

**S1 Table: Exposure of water sports participants in Lahn River to (antibiotic resistant) *E. coli*.**

| Activity            | Volume of water ingested [mL/h] | Duration session [h] | Range | prevalence                            |                                           |                                           |                                      |                                      |                                                    |                                                    | ingested per hour                |                                      |                                      |                                 |                                 |                                               |                                               | ingested per session                   |                                            |                                            |                                       |                                       |                                                     |                                                     |   |
|---------------------|---------------------------------|----------------------|-------|---------------------------------------|-------------------------------------------|-------------------------------------------|--------------------------------------|--------------------------------------|----------------------------------------------------|----------------------------------------------------|----------------------------------|--------------------------------------|--------------------------------------|---------------------------------|---------------------------------|-----------------------------------------------|-----------------------------------------------|----------------------------------------|--------------------------------------------|--------------------------------------------|---------------------------------------|---------------------------------------|-----------------------------------------------------|-----------------------------------------------------|---|
|                     |                                 |                      |       | (1) total <i>E. coli</i> [MPN/100 mL] | (2) resistant <i>E. coli</i> [MPN/100 mL] | (3) resistant <i>E. coli</i> [MPN/100 mL] | (4) ESBL <i>E. coli</i> [MPN/100 mL] | (5) ESBL <i>E. coli</i> [MPN/100 mL] | (6) diarrheagenic ESBL <i>E. coli</i> [MPN/100 mL] | (7) diarrheagenic ESBL <i>E. coli</i> [MPN/100 mL] | (1) total <i>E. coli</i> [MPN/h] | (2) resistant <i>E. coli</i> [MPN/h] | (3) resistant <i>E. coli</i> [MPN/h] | (4) ESBL <i>E. coli</i> [MPN/h] | (5) ESBL <i>E. coli</i> [MPN/h] | (6) diarrheagenic ESBL <i>E. coli</i> [MPN/h] | (7) diarrheagenic ESBL <i>E. coli</i> [MPN/h] | (1) total <i>E. coli</i> [MPN/session] | (2) resistant <i>E. coli</i> [MPN/session] | (3) resistant <i>E. coli</i> [MPN/session] | (4) ESBL <i>E. coli</i> [MPN/session] | (5) ESBL <i>E. coli</i> [MPN/session] | (6) diarrheagenic ESBL <i>E. coli</i> [MPN/session] | (7) diarrheagenic ESBL <i>E. coli</i> [MPN/session] |   |
| Boating             | 3.7 <sup>a</sup>                | 4 <sup>b</sup>       | min   | 15                                    | 5                                         | 7                                         | 0                                    | 0                                    | 0                                                  | 0                                                  | 1                                | 0                                    | 0                                    | 0                               | 0                               | 0                                             | 0                                             | 2                                      | 1                                          | 1                                          | 0                                     | 0                                     | 0                                                   | 0                                                   | 0 |
|                     |                                 |                      | avg   | 3158                                  | 1011                                      | 1516                                      | 2                                    | 54                                   | 0                                                  | 5                                                  | 117                              | 37                                   | 56                                   | 0                               | 2                               | 0                                             | 0                                             | 467                                    | 150                                        | 224                                        | 0                                     | 8                                     | 0                                                   | 1                                                   |   |
|                     |                                 |                      | max   | 27730                                 | 8874                                      | 13310                                     | 14                                   | 471                                  | 1                                                  | 40                                                 | 1026                             | 328                                  | 492                                  | 1                               | 17                              | 0                                             | 1                                             | 4104                                   | 1313                                       | 1970                                       | 2                                     | 70                                    | 0                                                   | 6                                                   |   |
| Canoeing            | 3.9 <sup>a</sup>                | 2.6 <sup>b</sup>     | min   | 15                                    | 5                                         | 7                                         | 0                                    | 0                                    | 0                                                  | 0                                                  | 1                                | 0                                    | 0                                    | 0                               | 0                               | 0                                             | 0                                             | 2                                      | 0                                          | 1                                          | 0                                     | 0                                     | 0                                                   | 0                                                   | 0 |
|                     |                                 |                      | avg   | 3158                                  | 1011                                      | 1516                                      | 2                                    | 54                                   | 0                                                  | 5                                                  | 123                              | 39                                   | 59                                   | 0                               | 2                               | 0                                             | 0                                             | 320                                    | 102                                        | 154                                        | 0                                     | 5                                     | 0                                                   | 0                                                   | 0 |
|                     |                                 |                      | max   | 27730                                 | 8874                                      | 13310                                     | 14                                   | 471                                  | 1                                                  | 40                                                 | 1081                             | 346                                  | 519                                  | 1                               | 18                              | 0                                             | 2                                             | 2812                                   | 900                                        | 1350                                       | 1                                     | 48                                    | 0                                                   | 4                                                   |   |
| Fishing             | 3.6 <sup>a</sup>                | 4 <sup>b</sup>       | min   | 15                                    | 5                                         | 7                                         | 0                                    | 0                                    | 0                                                  | 0                                                  | 1                                | 0                                    | 0                                    | 0                               | 0                               | 0                                             | 0                                             | 2                                      | 1                                          | 1                                          | 0                                     | 0                                     | 0                                                   | 0                                                   | 0 |
|                     |                                 |                      | avg   | 3158                                  | 1011                                      | 1516                                      | 2                                    | 54                                   | 0                                                  | 5                                                  | 114                              | 36                                   | 55                                   | 0                               | 2                               | 0                                             | 0                                             | 455                                    | 146                                        | 218                                        | 0                                     | 8                                     | 0                                                   | 1                                                   |   |
|                     |                                 |                      | max   | 27730                                 | 8874                                      | 13310                                     | 14                                   | 471                                  | 1                                                  | 40                                                 | 998                              | 319                                  | 479                                  | 0                               | 17                              | 0                                             | 1                                             | 3993                                   | 1278                                       | 1917                                       | 2                                     | 68                                    | 0                                                   | 6                                                   |   |
| Kayaking            | 3.8 <sup>a</sup>                | -                    | min   | 15                                    | 5                                         | 7                                         | 0                                    | 0                                    | 0                                                  | 0                                                  | 1                                | 0                                    | 0                                    | 0                               | 0                               | 0                                             | 0                                             | -                                      | -                                          | -                                          | -                                     | -                                     | -                                                   | -                                                   | - |
|                     |                                 |                      | avg   | 3158                                  | 1011                                      | 1516                                      | 2                                    | 54                                   | 0                                                  | 5                                                  | 120                              | 38                                   | 58                                   | 0                               | 2                               | 0                                             | 0                                             | -                                      | -                                          | -                                          | -                                     | -                                     | -                                                   | -                                                   | - |
|                     |                                 |                      | max   | 27730                                 | 8874                                      | 13310                                     | 14                                   | 471                                  | 1                                                  | 40                                                 | 1054                             | 337                                  | 506                                  | 1                               | 18                              | 0                                             | 2                                             | -                                      | -                                          | -                                          | -                                     | -                                     | -                                                   | -                                                   | - |
| Rowing              | 3.5 <sup>a</sup>                | -                    | min   | 15                                    | 5                                         | 7                                         | 0                                    | 0                                    | 0                                                  | 0                                                  | 1                                | 0                                    | 0                                    | 0                               | 0                               | 0                                             | 0                                             | -                                      | -                                          | -                                          | -                                     | -                                     | -                                                   | -                                                   | - |
|                     |                                 |                      | avg   | 3158                                  | 1011                                      | 1516                                      | 2                                    | 54                                   | 0                                                  | 5                                                  | 111                              | 35                                   | 53                                   | 0                               | 2                               | 0                                             | 0                                             | -                                      | -                                          | -                                          | -                                     | -                                     | -                                                   | -                                                   | - |
|                     |                                 |                      | max   | 27730                                 | 8874                                      | 13310                                     | 14                                   | 471                                  | 1                                                  | 40                                                 | 971                              | 311                                  | 466                                  | 0                               | 16                              | 0                                             | 1                                             | -                                      | -                                          | -                                          | -                                     | -                                     | -                                                   | -                                                   | - |
| Boating             | 1.9 <sup>b</sup>                | 4 <sup>b</sup>       | min   | 15                                    | 5                                         | 7                                         | 0                                    | 0                                    | 0                                                  | 0                                                  | 0                                | 0                                    | 0                                    | 0                               | 0                               | 0                                             | 0                                             | 1                                      | 0                                          | 1                                          | 0                                     | 0                                     | 0                                                   | 0                                                   | 0 |
|                     |                                 |                      | avg   | 3158                                  | 1011                                      | 1516                                      | 2                                    | 54                                   | 0                                                  | 5                                                  | 60                               | 19                                   | 29                                   | 0                               | 1                               | 0                                             | 0                                             | 240                                    | 77                                         | 115                                        | 0                                     | 4                                     | 0                                                   | 0                                                   | 0 |
|                     |                                 |                      | max   | 27730                                 | 8874                                      | 13310                                     | 14                                   | 471                                  | 1                                                  | 40                                                 | 527                              | 169                                  | 253                                  | 0                               | 9                               | 0                                             | 1                                             | 2107                                   | 674                                        | 1012                                       | 1                                     | 36                                    | 0                                                   | 3                                                   |   |
| Fishing             | 3.79 <sup>b</sup>               | 4 <sup>b</sup>       | min   | 15                                    | 5                                         | 7                                         | 0                                    | 0                                    | 0                                                  | 0                                                  | 1                                | 0                                    | 0                                    | 0                               | 0                               | 0                                             | 0                                             | 2                                      | 1                                          | 1                                          | 0                                     | 0                                     | 0                                                   | 0                                                   | 0 |
|                     |                                 |                      | avg   | 3158                                  | 1011                                      | 1516                                      | 2                                    | 54                                   | 0                                                  | 5                                                  | 120                              | 38                                   | 57                                   | 0                               | 2                               | 0                                             | 0                                             | 479                                    | 153                                        | 230                                        | 0                                     | 8                                     | 0                                                   | 1                                                   |   |
|                     |                                 |                      | max   | 27730                                 | 8874                                      | 13310                                     | 14                                   | 471                                  | 1                                                  | 40                                                 | 1051                             | 336                                  | 504                                  | 1                               | 18                              | 0                                             | 2                                             | 4204                                   | 1345                                       | 2018                                       | 2                                     | 71                                    | 0                                                   | 6                                                   |   |
| Canoeing            | 7.52 <sup>b</sup>               | 2.6 <sup>b</sup>     | min   | 15                                    | 5                                         | 7                                         | 0                                    | 0                                    | 0                                                  | 0                                                  | 1                                | 0                                    | 1                                    | 0                               | 0                               | 0                                             | 0                                             | 3                                      | 1                                          | 1                                          | 0                                     | 0                                     | 0                                                   | 0                                                   | 0 |
|                     |                                 |                      | avg   | 3158                                  | 1011                                      | 1516                                      | 2                                    | 54                                   | 0                                                  | 5                                                  | 237                              | 76                                   | 114                                  | 0                               | 4                               | 0                                             | 0                                             | 617                                    | 198                                        | 296                                        | 0                                     | 10                                    | 0                                                   | 1                                                   |   |
|                     |                                 |                      | max   | 27730                                 | 8874                                      | 13310                                     | 14                                   | 471                                  | 1                                                  | 40                                                 | 2085                             | 667                                  | 1001                                 | 1                               | 35                              | 0                                             | 3                                             | 5422                                   | 1735                                       | 2602                                       | 3                                     | 92                                    | 0                                                   | 8                                                   |   |
| Swimming (children) | 49.33 <sup>c</sup>              | 1.32 <sup>d</sup>    | min   | 15                                    | 5                                         | 7                                         | 0                                    | 0                                    | 0                                                  | 0                                                  | 7                                | 2                                    | 4                                    | 0                               | 0                               | 0                                             | 0                                             | 10                                     | 3                                          | 5                                          | 0                                     | 0                                     | 0                                                   | 0                                                   | 0 |
|                     |                                 |                      | avg   | 3158                                  | 1011                                      | 1516                                      | 2                                    | 54                                   | 0                                                  | 5                                                  | 1558                             | 499                                  | 748                                  | 1                               | 26                              | 0                                             | 2                                             | 2057                                   | 658                                        | 987                                        | 1                                     | 35                                    | 0                                                   | 3                                                   |   |
|                     |                                 |                      | max   | 27730                                 | 8874                                      | 13310                                     | 14                                   | 471                                  | 1                                                  | 40                                                 | 13679                            | 4377                                 | 6566                                 | 7                               | 233                             | 1                                             | 20                                            | 18057                                  | 5778                                       | 8667                                       | 9                                     | 307                                   | 1                                                   | 26                                                  |   |
| Swimming (adults)   | 21.33 <sup>c</sup>              | 1.32 <sup>d</sup>    | min   | 15                                    | 5                                         | 7                                         | 0                                    | 0                                    | 0                                                  | 0                                                  | 3                                | 1                                    | 2                                    | 0                               | 0                               | 0                                             | 0                                             | 4                                      | 1                                          | 2                                          | 0                                     | 0                                     | 0                                                   | 0                                                   | 0 |
|                     |                                 |                      | avg   | 3158                                  | 1011                                      | 1516                                      | 2                                    | 54                                   | 0                                                  | 5                                                  | 674                              | 216                                  | 323                                  | 0                               | 11                              | 0                                             | 1                                             | 889                                    | 285                                        | 427                                        | 0                                     | 15                                    | 0                                                   | 1                                                   |   |
|                     |                                 |                      | max   | 27730                                 | 8874                                      | 13310                                     | 14                                   | 471                                  | 1                                                  | 40                                                 | 5915                             | 1893                                 | 2839                                 | 3                               | 101                             | 0                                             | 9                                             | 7808                                   | 2498                                       | 3748                                       | 4                                     | 133                                   | 0                                                   | 11                                                  |   |

(1) Herrig et al. 2015

(2) calculated based on (1) and Blaak et al. 2011 (32 % of *E. coli* AB-resistant *E. coli*)

(3) calculated based on (1) and Blaak et al. 2011 (48 % of *E. coli* AB-resistant)

(4) calculated based on (1) and Blaak et al. 2014 (0.05 % of *E. coli* producing ESBL)

(5) calculated based on (1) and Haberecht et al. 2019 (1.7 % of *E. coli* producing ESBL)

(6) calculated based on (4) and Franz et al. 2015 (8.5 % of ESBL producing *E. coli* diarrheagenic)

(7) calculated based on (5) and Franz et al. 2015 (8.5 % of ESBL producing *E. coli* diarrheagenic)

a) Dorevitch et al. 2011

b) Rijal et al. 2011

c) Dufour et al. 2006

d) Schets et al. 2011
