# Supplementary material for: Prevalence and seasonal dynamics of blaCTX-M antibiotic resistance genes and fecal indicator organisms in the lower Lahn River, Germany
Source: PubMed Central journal article supplement (PMC7192499; doi:10.1371/journal.pone.0232289), 2020-04-30
Supplement: pone.0232289.s002.pdf [file pone.0232289.s002.pdf]

## Supporting Information

### Prevalence and seasonal dynamics of *bla*<sub>CTX-M</sub> antibiotic resistance genes and fecal indicator organisms in the lower Lahn River, Germany

Ilona Herrig<sup>1,2\*</sup>, Susanne Fleischmann<sup>1, #a</sup>, Julia Regnery<sup>1</sup>, Jessica Wesp<sup>1</sup>, Georg Reifferscheid<sup>1</sup>, Werner Manz<sup>2</sup>

<sup>1</sup> Department Biochemistry, Ecotoxicology, Federal Institute of Hydrology, Koblenz, Germany

<sup>2</sup> Department of Biology, Institute for Integrated Natural Sciences, University of Koblenz-Landau, Koblenz, Germany

<sup>#a</sup> Current Address: Department of Veterinary Medicine, Institute of Food Safety and Food Hygiene, FU Berlin, Germany

\* Corresponding author

E-mail: [iherrig@uni-koblenz.de](mailto:iherrig@uni-koblenz.de) (IH)

**S2 Table: Exposure of water sports participants in Lahn River to *bla*<sub>CTX-M</sub> antibiotic resistance genes.**

|                     |                                 |                      |       | prevalence                                  | ingested per hour                      | ingested per session                         |
|---------------------|---------------------------------|----------------------|-------|---------------------------------------------|----------------------------------------|----------------------------------------------|
| Activity            | Volume of water ingested [mL/h] | Duration session [h] | Range | <i>bla</i> <sub>CTX-M</sub> [copies/100 mL] | <i>bla</i> <sub>CTX-M</sub> [copies/h] | <i>bla</i> <sub>CTX-M</sub> [copies/session] |
| Boating             | 3.7 <sup>a</sup>                | 4 <sup>b</sup>       | min   | 349                                         | 13                                     | 52                                           |
|                     |                                 |                      | avg   | 3179                                        | 118                                    | 470                                          |
|                     |                                 |                      | max   | 20083                                       | 743                                    | 2972                                         |
| Canoeing            | 3.9 <sup>a</sup>                | 2.6 <sup>b</sup>     | min   | 349                                         | 14                                     | 35                                           |
|                     |                                 |                      | avg   | 3179                                        | 124                                    | 335                                          |
|                     |                                 |                      | max   | 20083                                       | 783                                    | 2115                                         |
| Fishing             | 3.6 <sup>a</sup>                | 4 <sup>b</sup>       | min   | 349                                         | 13                                     | 50                                           |
|                     |                                 |                      | avg   | 3179                                        | 114                                    | 458                                          |
|                     |                                 |                      | max   | 20083                                       | 723                                    | 2892                                         |
| Kayaking            | 3.8 <sup>a</sup>                | -                    | min   | 349                                         | 13                                     | -                                            |
|                     |                                 |                      | avg   | 3179                                        | 121                                    | -                                            |
|                     |                                 |                      | max   | 20083                                       | 763                                    | -                                            |
| Rowing              | 3.5 <sup>a</sup>                | -                    | min   | 349                                         | 12                                     | -                                            |
|                     |                                 |                      | avg   | 3179                                        | 111                                    | -                                            |
|                     |                                 |                      | max   | 20083                                       | 703                                    | -                                            |
| Boating             | 1.9 <sup>b</sup>                | 4 <sup>b</sup>       | min   | 349                                         | 7                                      | 27                                           |
|                     |                                 |                      | avg   | 3179                                        | 60                                     | 242                                          |
|                     |                                 |                      | max   | 20083                                       | 382                                    | 1526                                         |
| Fishing             | 3.79 <sup>b</sup>               | 4 <sup>b</sup>       | min   | 349                                         | 13                                     | 53                                           |
|                     |                                 |                      | avg   | 3179                                        | 120                                    | 482                                          |
|                     |                                 |                      | max   | 20083                                       | 761                                    | 3045                                         |
| Canoeing            | 7.52 <sup>b</sup>               | 2.6 <sup>b</sup>     | min   | 349                                         | 26                                     | 68                                           |
|                     |                                 |                      | avg   | 3179                                        | 239                                    | 622                                          |
|                     |                                 |                      | max   | 20083                                       | 1510                                   | 3927                                         |
| Swimming (children) | 49.33 <sup>c</sup>              | 1.32 <sup>d</sup>    | min   | 349                                         | 172                                    | 227                                          |
|                     |                                 |                      | avg   | 3179                                        | 1568                                   | 2070                                         |
|                     |                                 |                      | max   | 20083                                       | 9907                                   | 13077                                        |
| Swimming (adults)   | 21.33 <sup>c</sup>              | 1.32 <sup>d</sup>    | min   | 349                                         | 74                                     | 98                                           |
|                     |                                 |                      | avg   | 3179                                        | 678                                    | 895                                          |
|                     |                                 |                      | max   | 20083                                       | 4284                                   | 5654                                         |

a) Dorevitch et al. 2011

b) Rijal et al. 2011

c) Dufour et al. 2006

d) Schets et al. 2011
